# Supplementary material for: The Short-Term Effect of Ambient Temperature on Mortality in Wuhan, China: A Time-Series Study Using a Distributed Lag Non-Linear Model
Source: MDPI journal article supplement (doi:10.3390/ijerph13070722), 2016-07-18
Supplement: s1 [file s1]

# Supplementary Materials: The Short-Term Effect of Ambient Temperature on Mortality in Wuhan, China: A Time-Series Study Using a Distributed Lag Non-Linear Model

Yunquan Zhang, Cunlu Li, Renjie Feng, Yaohui Zhu, Kai Wu, Xiaodong Tan and Lu Ma

**Table S1.** Cold and hot thresholds of mean temperature for total mortality stratified by age.

| Age Group | Cold Threshold (°C) | Hot Threshold (°C) |
|-----------|---------------------|--------------------|
| Age < 65  | 15.9                | 27.3               |
| Age ≥ 65  | 18.2                | 32.1               |

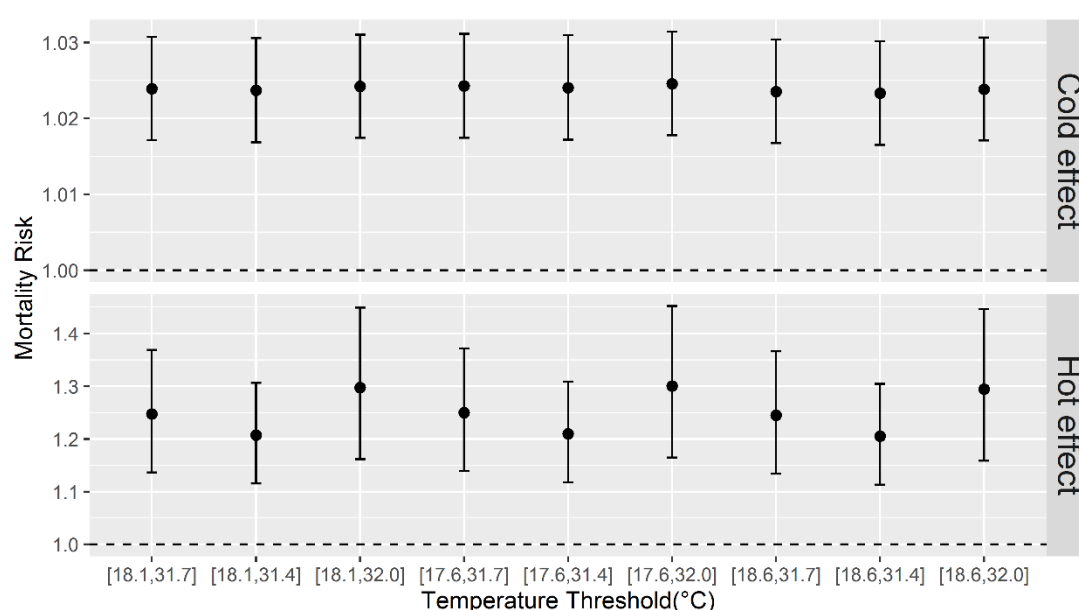

**Figure S1.** Sensitivity analyses for total mortality using different threshold values.

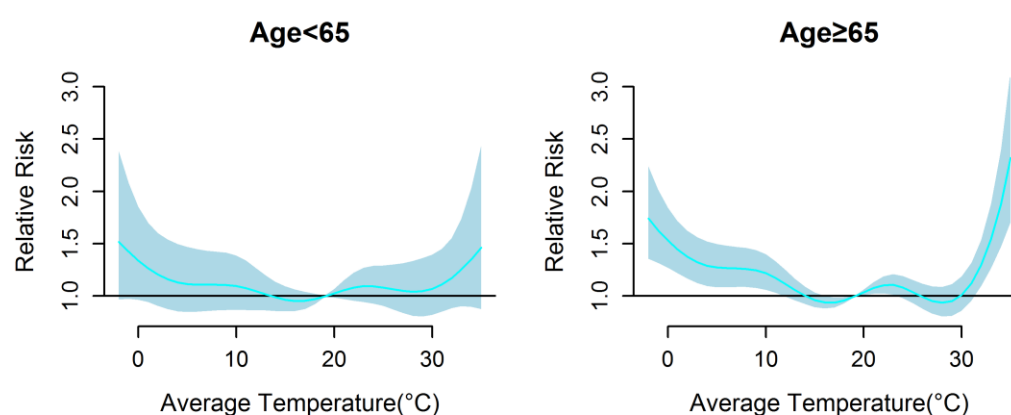

**Figure S2.** The non-linear effects of mean temperature on age-specific mortality at lag 0–21 (total mortality).

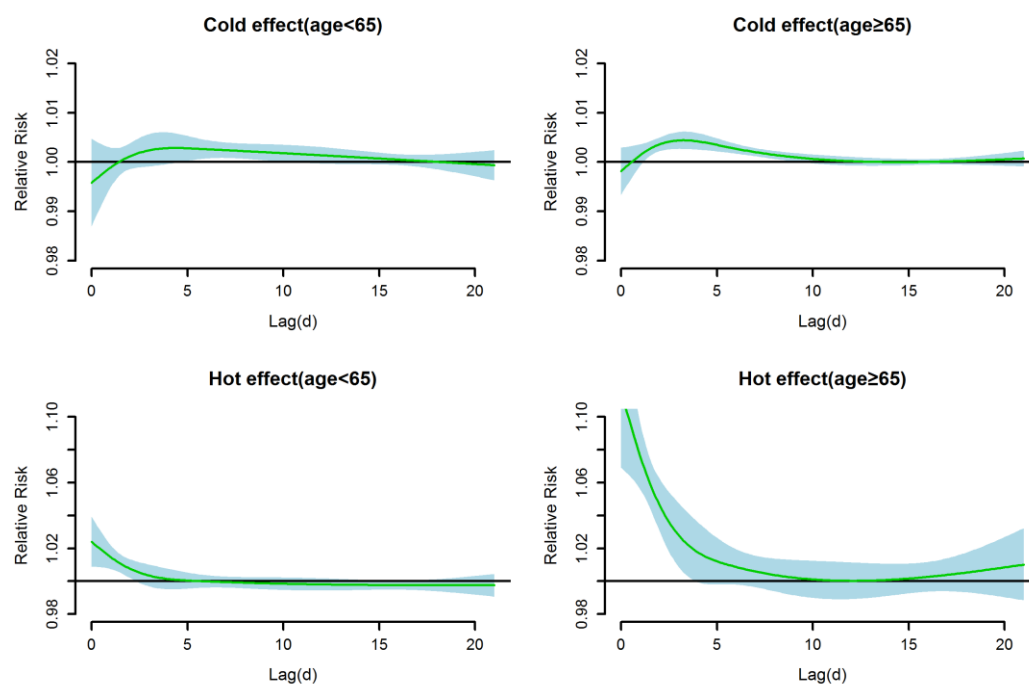

**Figure S3.** The estimated effects of a 1 °C decrease in mean temperature below the cold threshold (**above**) and of a 1 °C increase in mean temperature above the hot threshold (**below**) on age-specific mortality over 21 days of lag.

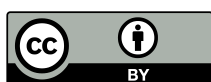

© 2016 by the authors. Submitted for possible open access publication under the terms and conditions of the Creative Commons Attribution (CC-BY) license (<http://creativecommons.org/licenses/by/4.0/>).
